# Supplementary material for: Photodissociation dynamics of fulvenallene, C7H6
Source: Royal Society of Chemistry journal article supplement (doi:10.1039/c3cp52274a), 2013-01-01
Supplement: c3cp52274a.pdf [file c3cp52274a.pdf]

Electronic Supplementary Information for:

## Photodissociation Dynamics of Fulvenallene, C<sub>7</sub>H<sub>6</sub>

*Jens Giegerich and Ingo Fischer*

Institut of Physical & Theoretical Chemistry, University of Würzburg, Am Hubland, D-97074

Würzburg; E-mail: [ingo.fischer@uni-wuerzburg.de](mailto:ingo.fischer@uni-wuerzburg.de)

This file contains:

- a) Translational energy distribution of H-atoms,  $P(E_T)$  produced in the photodissociation of phthalide.
- b) Photofragment angular distribution (PAD) of H-atoms produced in the photodissociation of phthalide.
- c) Rate for H-atom loss with pyrolysis on.
- d) Comparison of translational energy distributions with and without pyrolysis.
- e) Dependence of the fit to the translational energy distribution on the parameter  $n$  in expression (1) of the main paper.
- f) Computed geometry of electronic ground state of fulvenallene.

a)

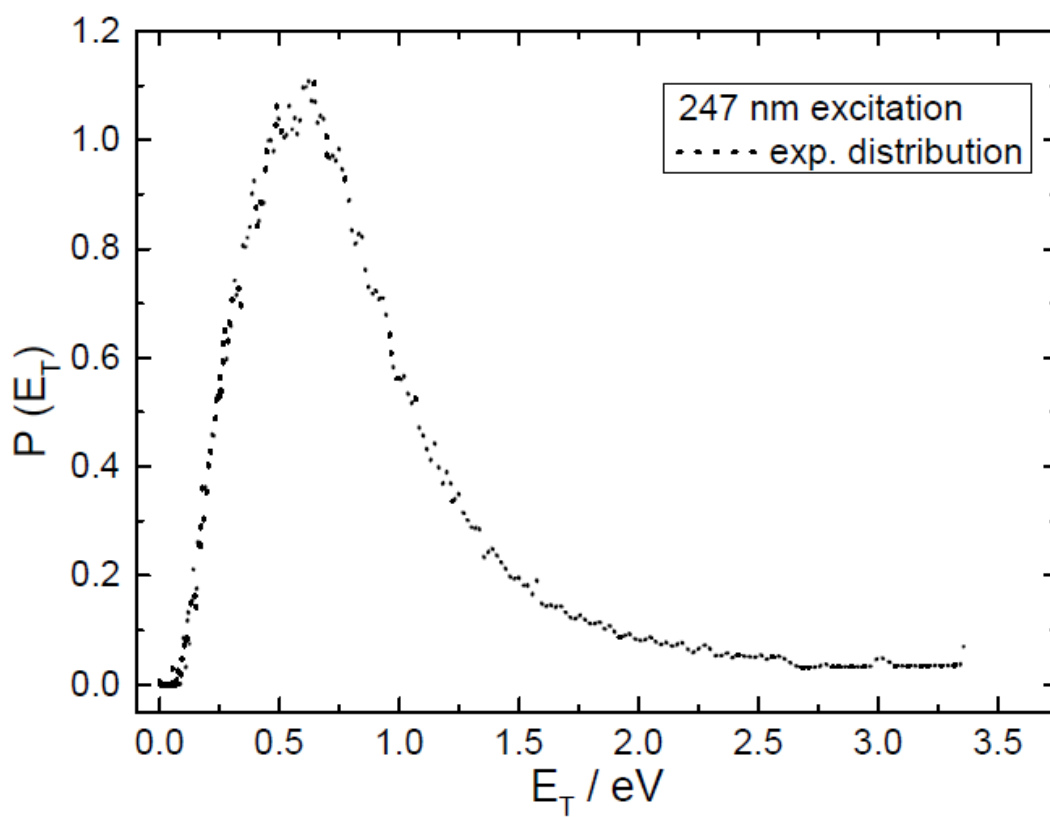

Translational energy distribution of H-atoms produced in the photodissociation of phthalide. The distribution peaks at 0.58 eV, while the distribution of H-atoms from fulvenallene peaks at 0.05 eV. Electrons with a kinetic energy release of up to 3 eV are formed. Overall the distribution differs significantly from the one derived for  $C_7H_6$ . Note that the H-atoms originate from a two-photon excitation of phthalide.

b)

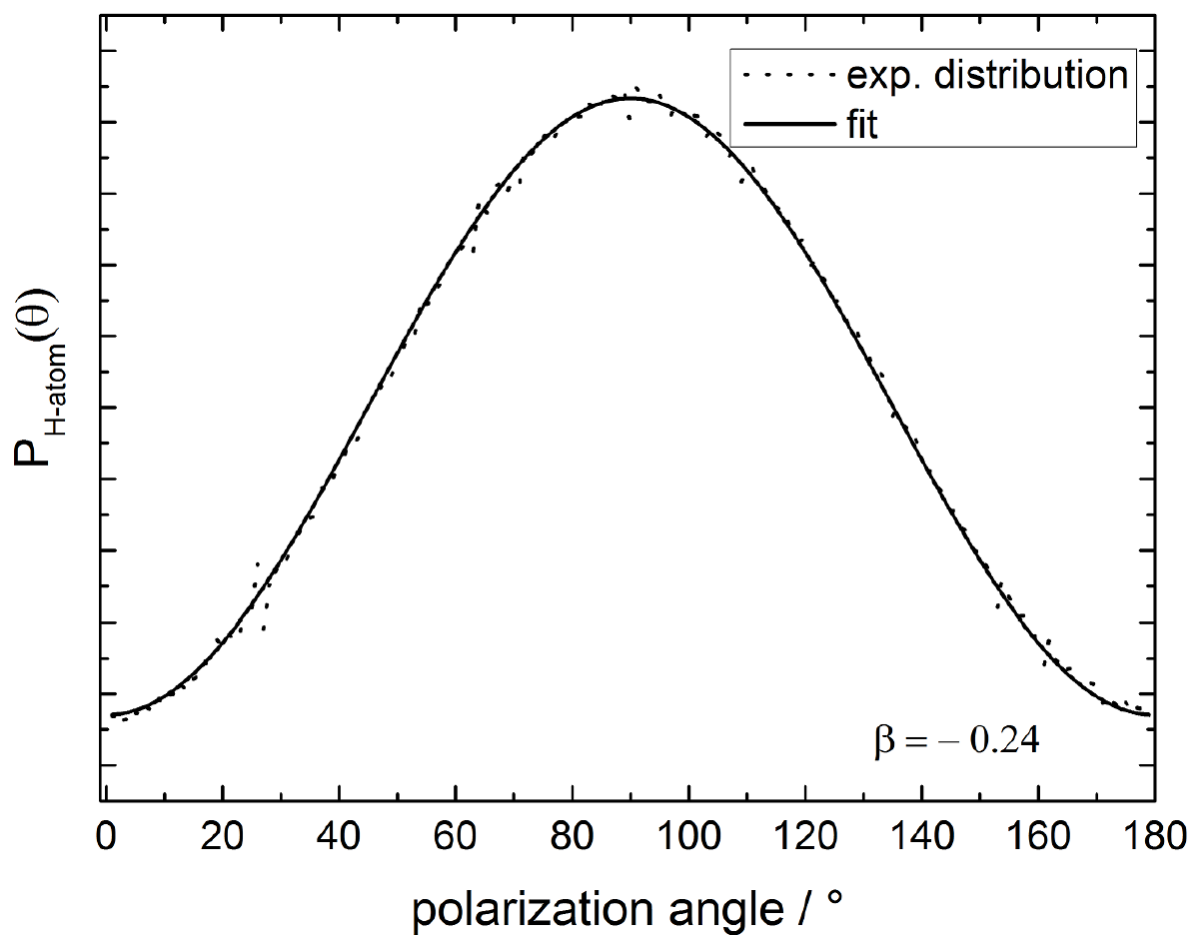

Angular distribution of H-atom photofragments produced in the photodissociation of phthalide. The experimental distribution was fitted with expression (2) as given in the main paper. As visible the distribution is anisotropic and a  $\beta$ -parameter of -0.24 is obtained.

c)

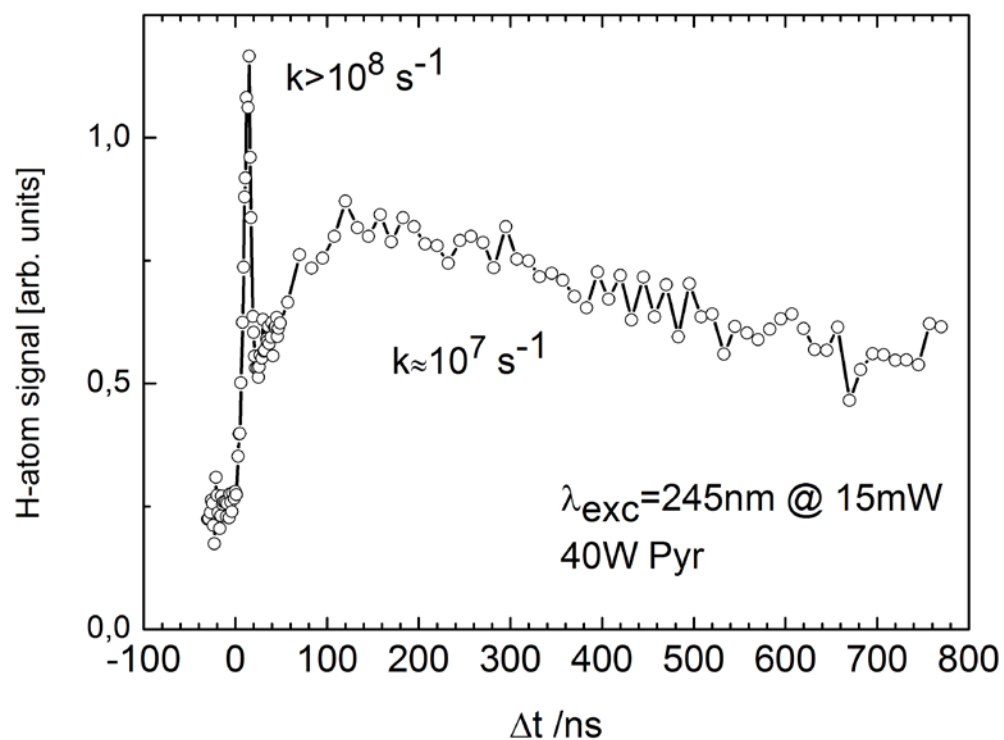

The figure depicts the rate for H-atom loss. Two contributions are visible, a fast one that is also present without pyrolysis and thus assigned to H-atom loss from phthalide and a slower one that is due to H-atom loss from fulvenallene. The spot size of the VUV laser was deliberately chosen to permit a fast fly out of the H-atoms. Under the optimized conditions employed for the data depicted in the main paper, the fly out of H-atoms from phthalide was slower and the two rates could not be separated as well.

d)

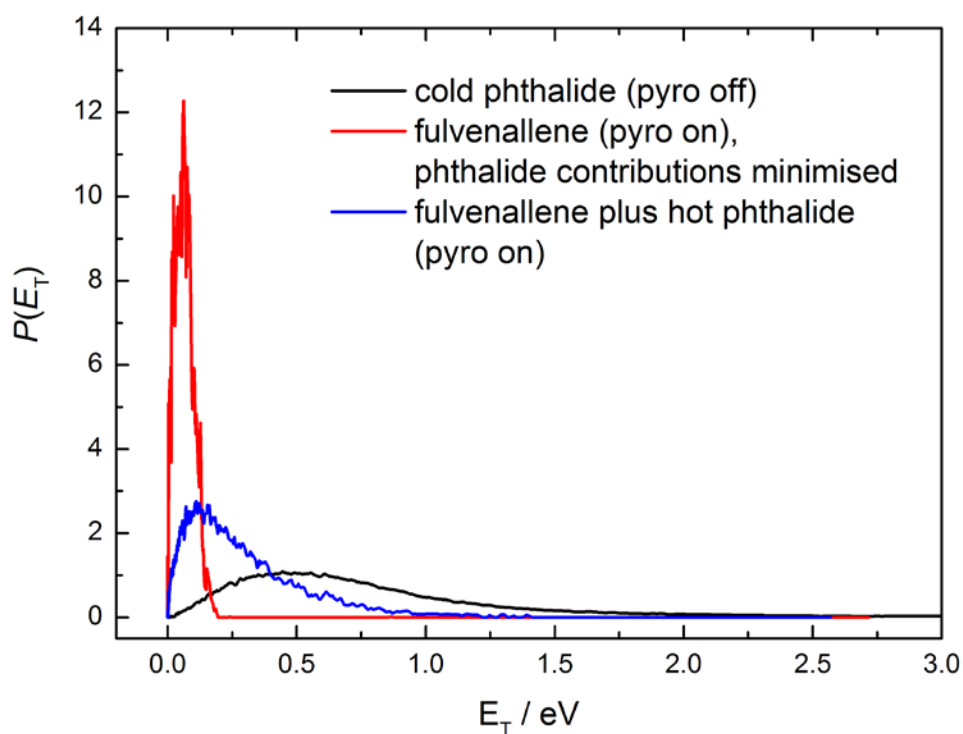

The figure presents a comparison of H-atom translational energy distributions. The black line corresponds to H-atoms from cold phthalide (similar to figure a). The red line represents the distribution from fulvenallene, selected from the image with pyrolysis on around  $0^\circ$  as depicted in figure 6. The blue line finally represents a selected part of the image with pyrolysis on around  $90^\circ$ . It contains both contributions, *i.e.* is perturbations from hot phthalide are present.

e)

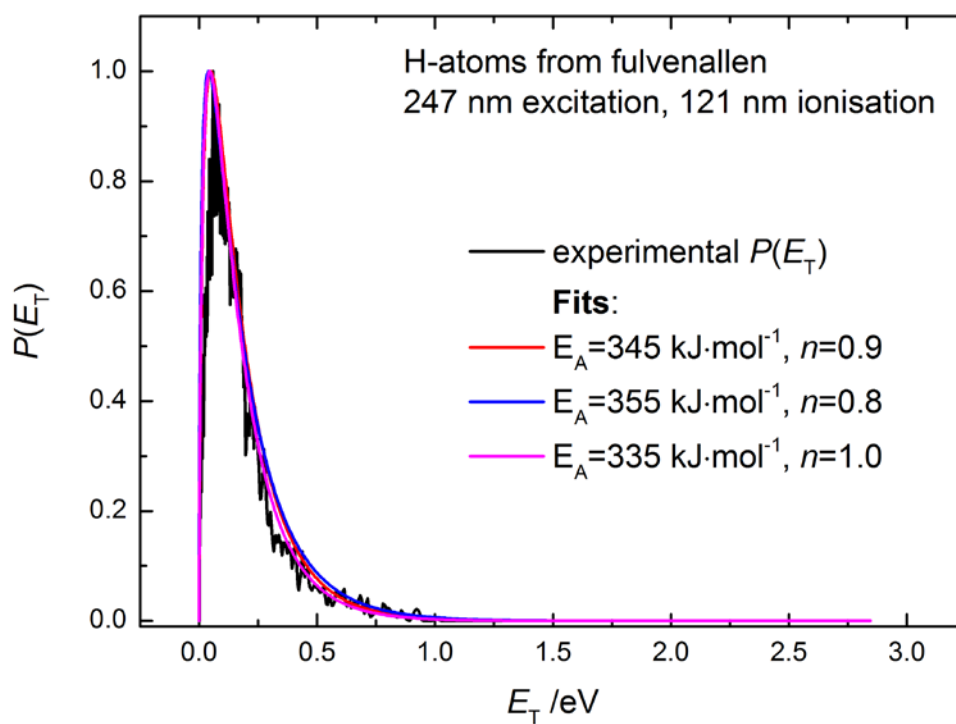

The translational energy distribution of H-atoms from fulvenallene is described by expression (1). Here the dependence of the fitting parameter  $n$  in expression (1) on the activation barrier/excess energy is shown. As visible a change of the activation barrier by  $\pm 10 \text{ kJ} \cdot \text{mol}^{-1}$  does not change  $n$  significantly.

f) Computed geometry of electronic ground state of fulvenallene.

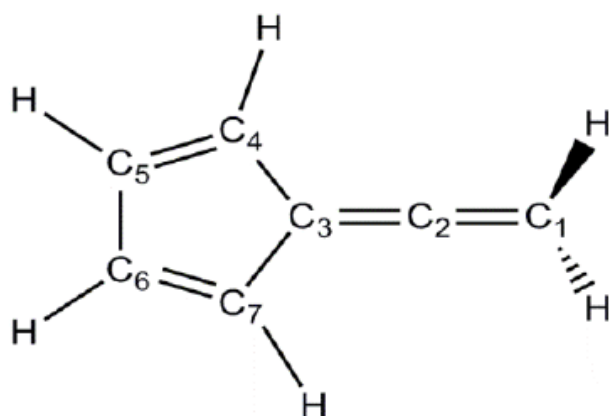

| fulvenallene                                        | ground state<br>B3LYP<br>6-311++G** |
|-----------------------------------------------------|-------------------------------------|
| C <sub>1</sub> - C <sub>2</sub> /pm                 | 129.9                               |
| C <sub>2</sub> - C <sub>3</sub>                     | 131.8                               |
| C <sub>3</sub> - C <sub>4</sub>                     | 147.4                               |
| C <sub>5</sub> - C <sub>6</sub>                     | 135.5                               |
| C <sub>1</sub> - H                                  | 146.7                               |
| C <sub>4</sub> - H                                  | 135.5                               |
| C <sub>5</sub> - H                                  | 146.7                               |
| H - C <sub>1</sub> - C <sub>2</sub> /°              | 121.3                               |
| H - C <sub>4</sub> - C <sub>5</sub> /°              | 128.2                               |
| H - C <sub>5</sub> - C <sub>6</sub> /°              | 124.7                               |
| C <sub>1</sub> - C <sub>2</sub> - C <sub>3</sub> /° | 180                                 |
| C <sub>2</sub> - C <sub>3</sub> - C <sub>4</sub> /° | 126.8                               |
| C <sub>3</sub> - C <sub>4</sub> - C <sub>5</sub> /° | 107.5                               |
| C <sub>4</sub> - C <sub>5</sub> - C <sub>6</sub> /° | 109.3                               |
